# Supplementary material
Source: PubMed Central journal article supplement (PMC3120047)
Supplement: NIHMS299666-supplement-Figures.pdf [file NIHMS299666-supplement-Figures.pdf]

# PROTEOMICS

## Supporting Information

### for Proteomics

**DOI 10.1002/pmic.201000722**

Yuexi Wang, Feng Yang, Marina Gritsenko, Yingchun Wang,  
Therese Clauss, Tao Liu, Yufeng Shen, Matthew E. Monroe,  
Daniel Lopez-Ferrer, Theresa Reno, Ronald J Moore,  
Richard L. Klemke, David G. Camp II and Richard D. Smith

**Reversed-phase chromatography with multiple fraction concatenation  
strategy for proteome profiling of human MCF10A cells**

**Supplementary figures:**

**Figure 1.** Overview of the experimental workflow. Same amount of starting material was applied to each approach in such a manner that each method was comparable. Details of the methods are described in the Materials and Methods part.

**Figure 2.** Physicochemical Properties of Identified Peptides.

**Figure 3.** Comparison of cellular component (A) and molecular function (B) of proteins identified using high pH RPLC, SCX LC and low pH RPLC fractionation methods.

**Figure 4.** LC profile of first dimension fractionation approaches (UV absorbance at 280nm).

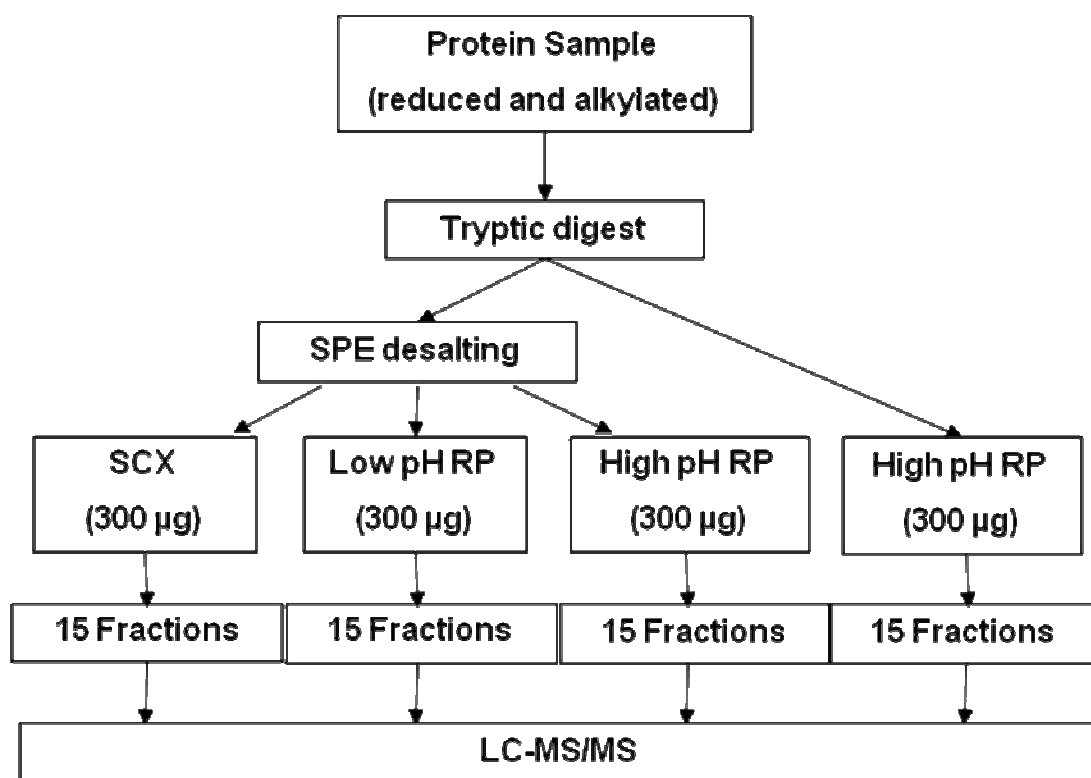

Figure 1.

(A)

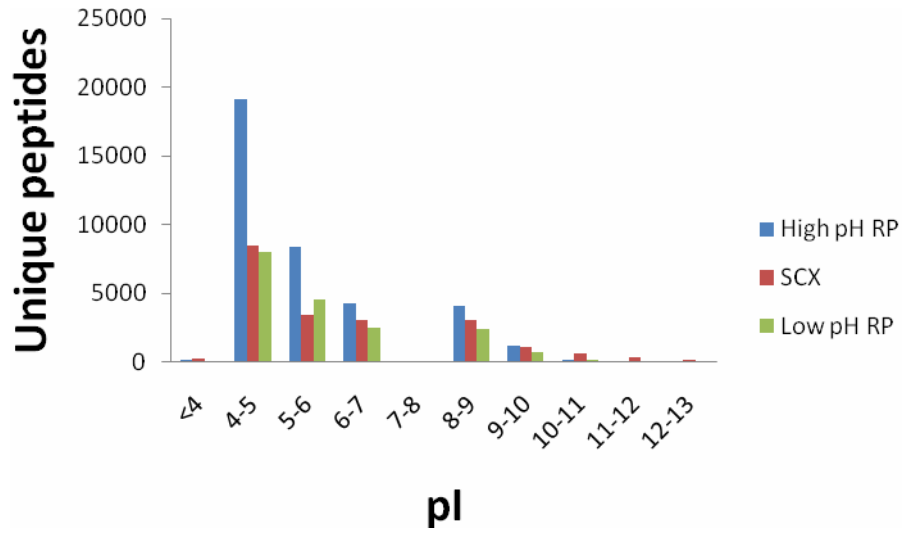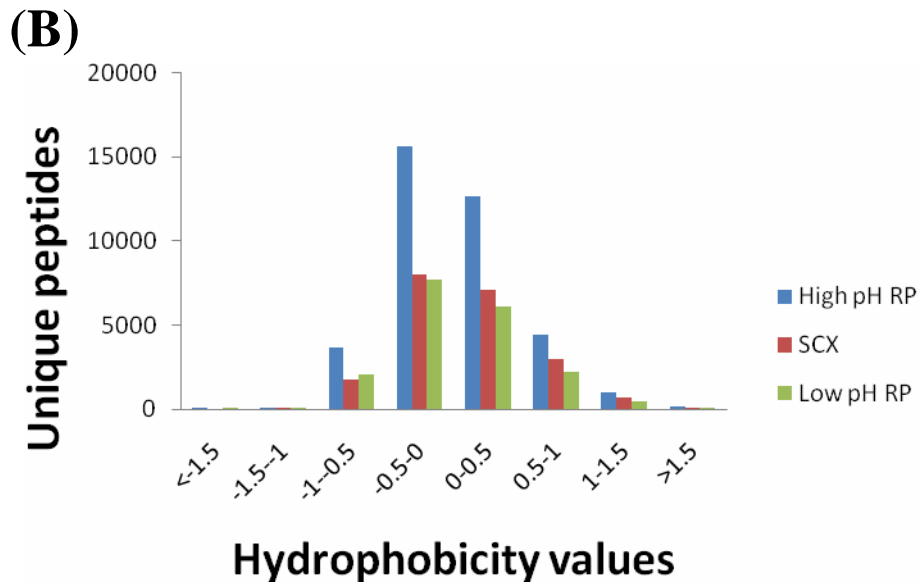

Figure 2.

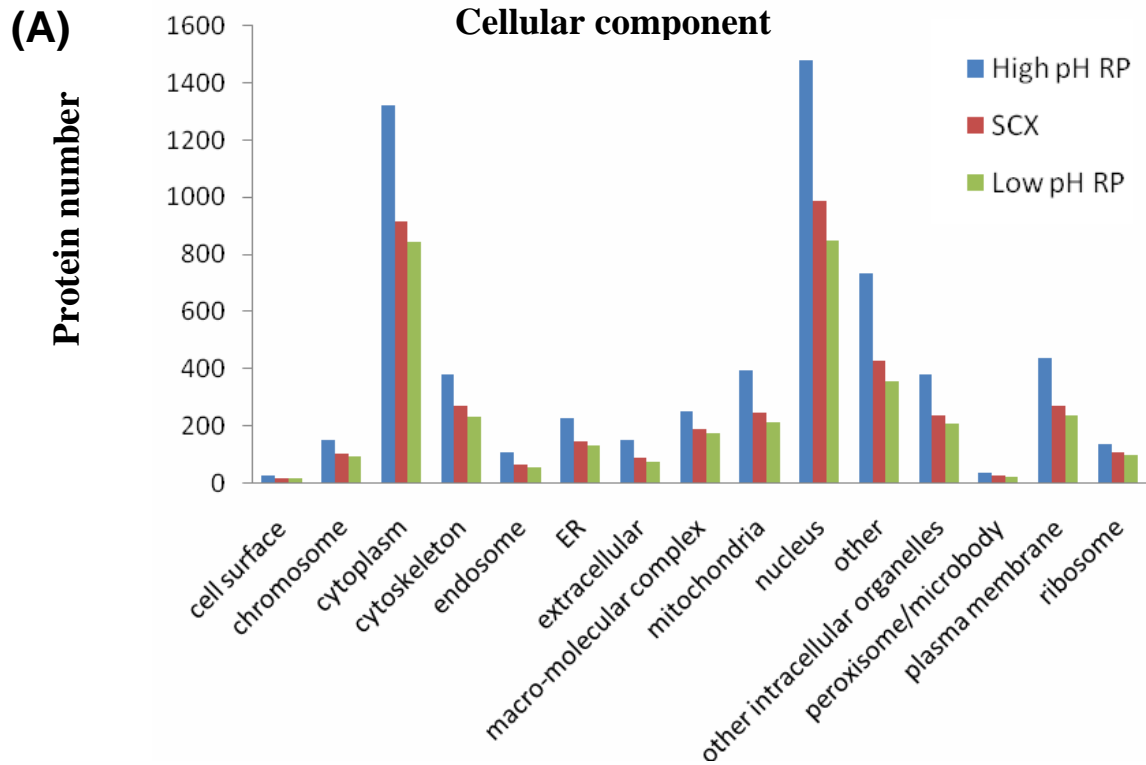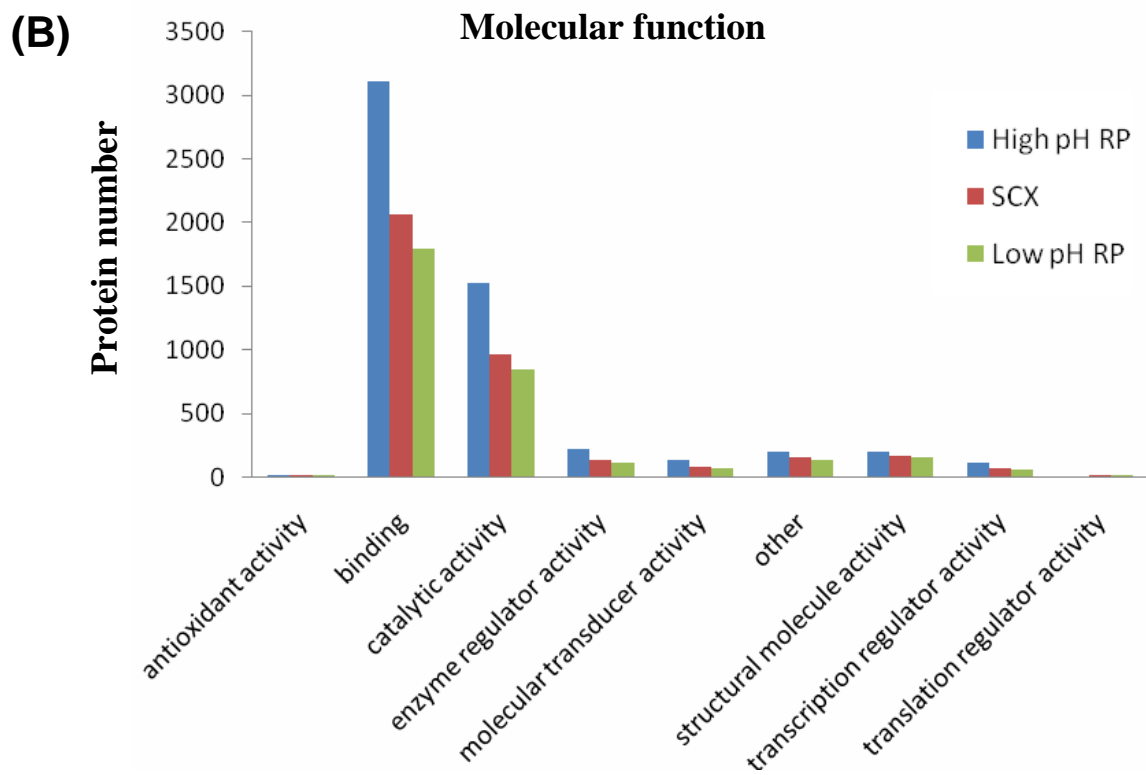

**Figure 3.**

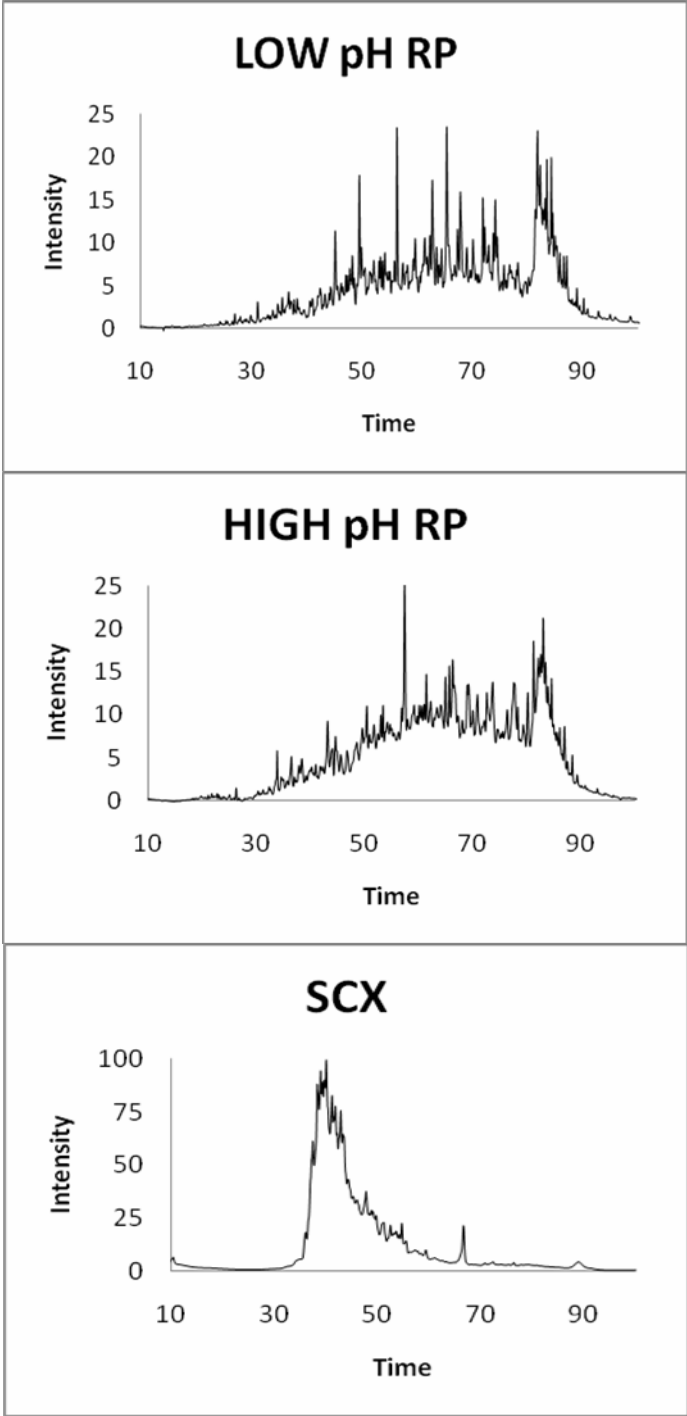

Figure 4.
